# Supplementary material for: Microcavity Enhanced Raman Spectroscopy of Fullerene C60 Bucky Balls
Source: MDPI journal article supplement (doi:10.3390/s20051470), 2020-03-07
Supplement: s1 [file s1]

# Microcavity Enhanced Raman Spectroscopy of Fullerene C<sub>60</sub> Bucky Balls

**Supplementary Materials:** The calculations of the normal vibrational modes were performed with the basis sets of 3-21+G\* and 6-31+G\* for neutral C<sub>60</sub> in a singlet state. As mentioned earlier, C<sub>60</sub> contains 174 normal modes which are reduced to total number of 46 distinct normal modes, because many modes are degenerate. Calculating vibrational modes of neutral singlet state C<sub>60</sub> with a basis set of 3-21+G\* revealed 16 negative normal modes as listed in Table S1.

**Table S1. Negative vibrational modes calculated with basis set of 3-21+G\***

| Mode | Frequency (cm <sup>-1</sup> ) | Mode | Frequency (cm <sup>-1</sup> ) |
|------|-------------------------------|------|-------------------------------|
| 1    | -1008.12                      | 9    | -476.11                       |
| 2    | -1004.93                      | 10   | -467.13                       |
| 3    | -1004.35                      | 11   | -459.99                       |
| 4    | -1001.39                      | 12   | -430.33                       |
| 5    | -619.07                       | 13   | -428.72                       |
| 6    | -616.93                       | 14   | -426.58                       |
| 7    | -615.26                       | 15   | -422.56                       |
| 8    | -484.25                       | 16   | -417.98                       |

We concluded that using a small basis set of 3-21+G\* is not sufficient to calculate the vibrational modes of our system. Using the basis set of 6-31+G\* revealed 174 normal modes without any negative vibrational modes. To obtain more accurate values of the frequencies, we multiplied the calculated normal modes with scaling factor of 0.98. To visualize the degeneration of the calculated normal modes, we plotted the normal modes versus their calculated frequency as shown in Figure S1. We extracted from the degeneracy plot 45 normal modes, listed in Table S2, and we believe the normal modes at 724-728 cm<sup>-1</sup> can be divided to two and assigning these two modes requires further investigation.

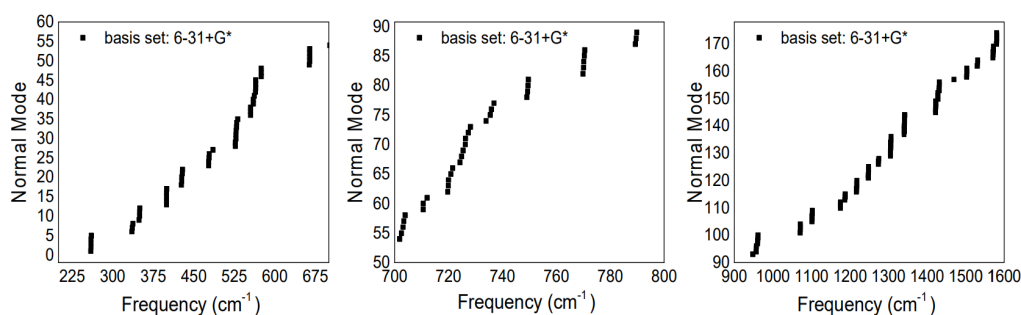

**Figure S1. Illustration of the calculated normal modes of neutral C<sub>60</sub> in at singlet state versus the modes' frequency.**

Table S2. Degenerate normal modes of neutral C<sub>60</sub> in a singlet state

| Mode | Degenerate modes(cm <sup>-1</sup> ) | Mode | Degenerate modes(cm <sup>-1</sup> ) | Mode | Degenerate modes(cm <sup>-1</sup> ) |
|------|-------------------------------------|------|-------------------------------------|------|-------------------------------------|
| 1    | 260                                 | 16   | 710                                 | 31   | 1187                                |
| 2    | 336                                 | 17   | 720                                 | 32   | 1217                                |
| 3    | 350                                 | 18   | 724-728                             | 33   | 1248                                |
| 4    | 400                                 | 19   | 733                                 | 34   | 1274                                |
| 5    | 428                                 | 20   | 735                                 | 35   | 1306                                |
| 6    | 478                                 | 21   | 749                                 | 36   | 1340                                |
| 7    | 485                                 | 22   | 770                                 | 37   | 1342                                |
| 8    | 528                                 | 23   | 789                                 | 38   | 1422                                |
| 9    | 531                                 | 24   | 824                                 | 39   | 1428                                |
| 10   | 555                                 | 25   | 948                                 | 40   | 1431                                |
| 11   | 562                                 | 26   | 957                                 | 41   | 1470                                |
| 12   | 565                                 | 27   | 960                                 | 42   | 1503                                |
| 13   | 575                                 | 28   | 1071                                | 43   | 1531                                |
| 14   | 664                                 | 29   | 1102                                | 44   | 1571                                |
| 15   | 703                                 | 30   | 1175                                | 45   | 1581                                |

We further investigated the correlation between the computed 10 Raman active normal modes of a singlet state C<sub>60</sub> to the experimental Raman active modes obtained in the SERS spectra of C<sub>60</sub> excited with laser excitations of 532 nm and 784 nm. Table S3. shows that the theoretical normal modes of C<sub>60</sub> in a singlet state nicely fit to the experimental Raman modes excited with wavelength of 784 nm, whereas excitation wavelength of 532 nm does not reveal two calculated Raman modes in addition to significant downshifting of the pentagonal pinch mode.

Table S3. Comparison between calculated Raman modes in singlet state C<sub>60</sub> to experimental Raman modes obtained i

| Mode | DFT       | 532 nm | Deviation | 784 nm  | Deviation |
|------|-----------|--------|-----------|---------|-----------|
| 1    | 259.8666  | 263    | 4.1334    | 265     | 5.1334    |
| 2    | 427.8876  | 428    | 0.1124    | 425     | -2.8876   |
| 3    | 485.7174  | 490    | 4.2826    | 490     | 4.2826    |
| 4    | 703.1794  | 723    | 19.8206   | 707     | 3.8206    |
| 5    | 769.9272  | 772    | 2.0728    | 769     | -0.9272   |
| 6    | 1102.7450 | -      | -         | 1098    | -4.745    |
| 7    | 1248.6570 | -      | -         | 1247    | -1.6572   |
| 8    | 1422.6660 | 1421   | -1.6660   | 1421.84 | -0.8260   |
| 9    | 1470.3720 | 1458   | -12.3724  | 1466    | -4.3724   |
| 10   | 1581.2790 | 1561   | -20.2790  | 1565.83 | -15.4490  |

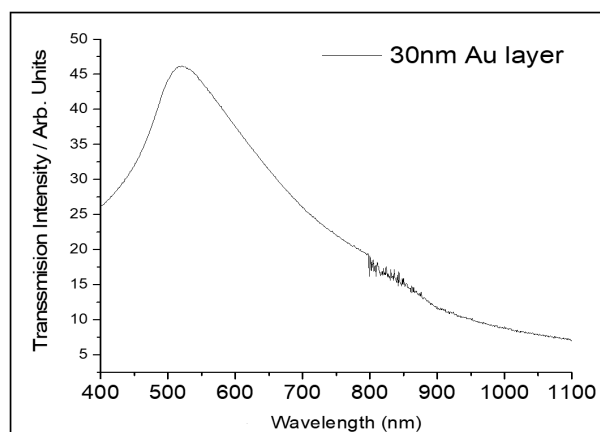

Figure S2. Transmission spectrum of 30nm thick gold

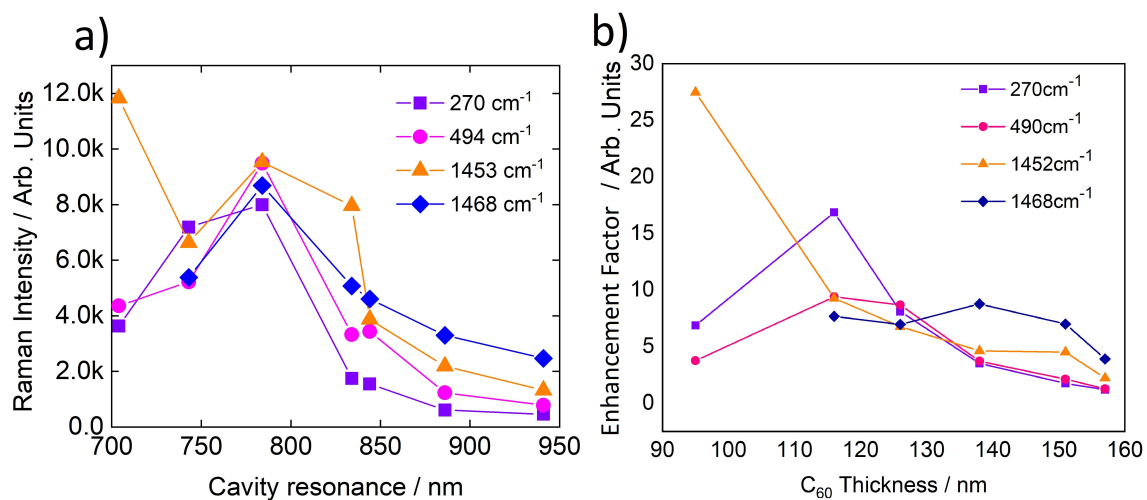

Figure S3 a) Graphical illustration of intensity variation across different Raman peaks of C<sub>60</sub> as compared with the cavity resonance

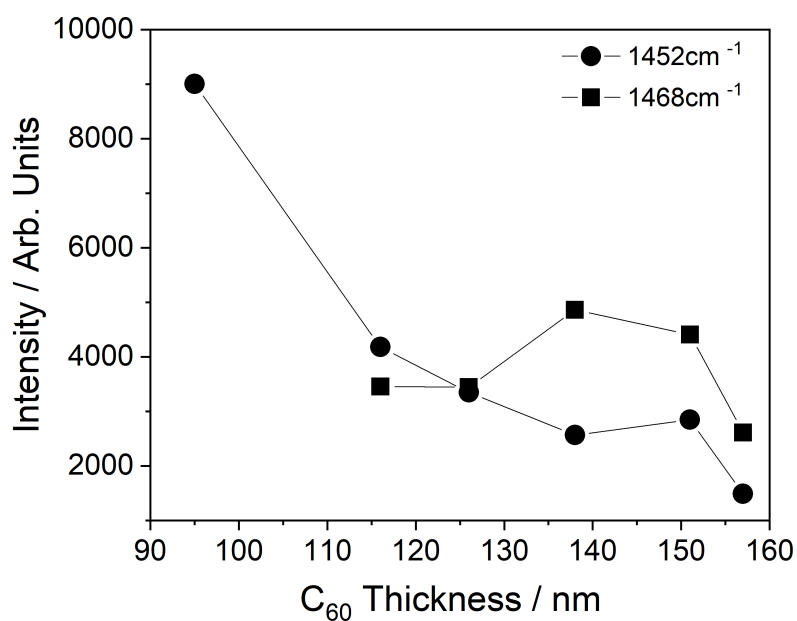

Figure S4 Variation in signal intensity variation across selectively enhanced Raman peaks of C<sub>60</sub>

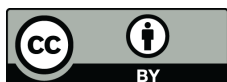

© by the authors. Licensee MDPI, Basel, Switzerland. This article is an open access article distributed under the terms and conditions of the Creative Commons Attribution (CC BY) license (<http://creativecommons.org/licenses/by/4.0/>).
