# Supplementary figures and images for: Microcavity Enhanced Raman Spectroscopy of Fullerene C60 Bucky Balls
Source: MDPI journal article supplement (doi:10.3390/s20051470), 2020-03-07

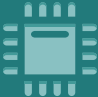

*sensors*

Supplement: s1 [file s1]

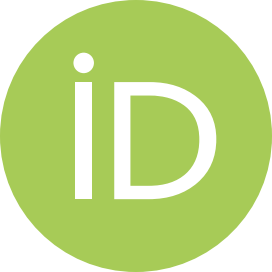

Supplement: s1 [file s1]

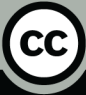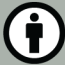

BY

Supplement: s1 [file s1]
